CORRECTION

# Correction: Smoking Behavior and Healthcare Expenditure in the United States, 1992–2009: Panel Data Estimates

The *PLOS Medicine* Staff

## Notice of Republication

This article was republished on May 19<sup>th</sup>, 2016 to correct poor figure quality in the PDF version, which was introduced during the typesetting process. The publisher apologizes for these issues with the figure quality. Please download this article again to view the updated version.

## Reference

1. Lightwood J, Glantz SA (2016) Smoking Behavior and Healthcare Expenditure in the United States, 1992–2009: Panel Data Estimates. *PLoS Med* 13(5): e1002020. doi:[10.1371/journal.pmed.1002020](https://doi.org/10.1371/journal.pmed.1002020) PMID: [27163933](https://pubmed.ncbi.nlm.nih.gov/27163933/)

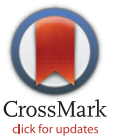

## OPEN ACCESS

**Citation:** The *PLOS Medicine* Staff (2016) Correction: Smoking Behavior and Healthcare Expenditure in the United States, 1992–2009: Panel Data Estimates. *PLoS Med* 13(6): e1002070. doi:[10.1371/journal.pmed.1002070](https://doi.org/10.1371/journal.pmed.1002070)

**Published:** June 15, 2016

**Copyright:** © 2016 The PLOS Medicine Staff. This is an open access article distributed under the terms of the [Creative Commons Attribution License](https://creativecommons.org/licenses/by/4.0/), which permits unrestricted use, distribution, and reproduction in any medium, provided the original author and source are credited.
